# Supplementary material for: 22.43%-Efficiency flexible modification-free perovskite solar cells with a uniform and anti-reflective ITO/SiO2/PET/SiO2 substrate
Source: Royal Society of Chemistry journal article supplement (doi:10.1039/d4ta03926b), 2024-01-01
Supplement: d4ta03926b1.pdf [file d4ta03926b1.pdf]

## Supplementary information

### 22.43%-efficiency flexible modification-free perovskite solar cells with a uniform and anti-reflective ITO/SiO<sub>2</sub>/PET/SiO<sub>2</sub> substrate

Jiwen Chen,<sup>a,b,‡</sup> Xi Fan,<sup>\*b,‡</sup> Jia Li,<sup>b</sup> Jinzhao Wang,<sup>c</sup> Jixi Zeng,<sup>b</sup> Wenqing Zhu<sup>\*a</sup> and Weijie Song<sup>\*b,c,d</sup>

<sup>a</sup>School of Materials Science and Engineering, Shanghai University, 99 Shangda Road, Shanghai 200444, P.R. China.

<sup>b</sup>Ningbo Institute of Materials Technology and Engineering, Chinese Academy of Sciences, Ningbo, 315201, P.R. China.

<sup>c</sup>Center of Materials Science and Optoelectronics Engineering, University of Chinese Academy of Sciences, Beijing 100049, P.R. China.

<sup>d</sup>Research Center for Sensing Materials and Devices, Zhejiang Lab, Hangzhou, Zhejiang 311121, P.R. China.

<sup>e</sup>School of Material Science and Engineering, Hubei University, Wuhan 430062, P.R. China.

\*Correspondence: fanxi@nimte.ac.cn (X. F.); wqzhu@shu.edu.cn (W. Z.); weijiesong@nimte.ac.cn (W.J. S.)

‡ Jiwen Chen and Xi Fan contributed equally to this work.

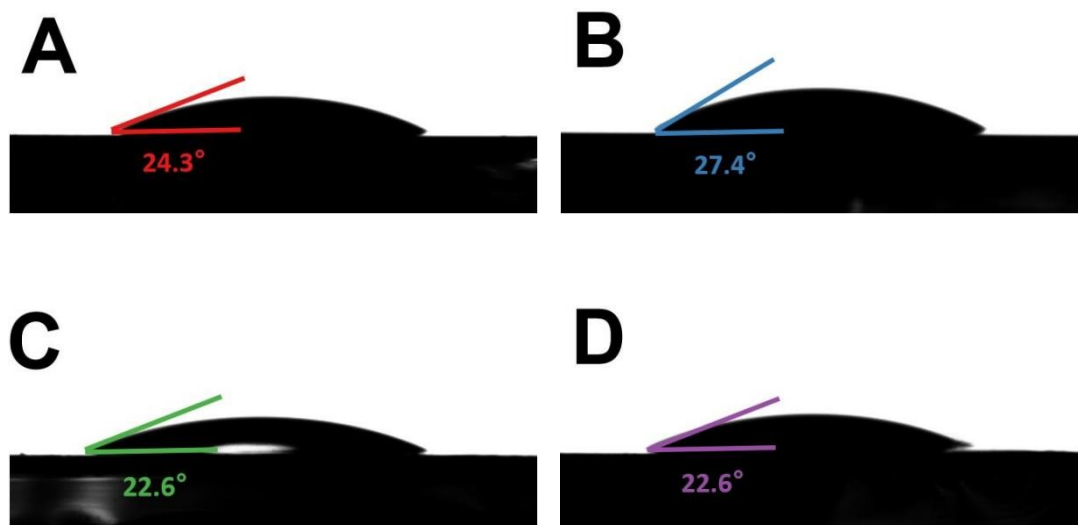

**Figure 1.** Wettability characteristics of the MeO-2PACz droplets on these ITO transparent electrodes. Obviously, the droplets of MeO-2PACz showed a good wettability with a contact angle of  $\sim 24.3^\circ$  on the surfaces of the  $\alpha$ -ITO/SiO<sub>2</sub>/PET/SiO<sub>2</sub>, which is smaller than that ( $\sim 27.4^\circ$ ) of the droplets on the surface of the  $\beta$ -ITO/SiO<sub>2</sub>/PET/SiO<sub>2</sub>. The smaller contact angle suggests a higher hydrophilic property of the  $\alpha$ -ITO and an intimate contact at interfaces. The enhanced wettability is favorable for a better deposition of the MeO-2PACz HTLs. When the MeO-2PACz droplets were dipped on both  $\gamma$ - and  $\delta$ -ITO, the droplets showed a comparable wettability with a small contact angle of  $\sim 22.6^\circ$ . The results demonstrate an intimate interface contact between the MeO-2PACz and the  $\gamma$ - and  $\delta$ -ITO electrodes.

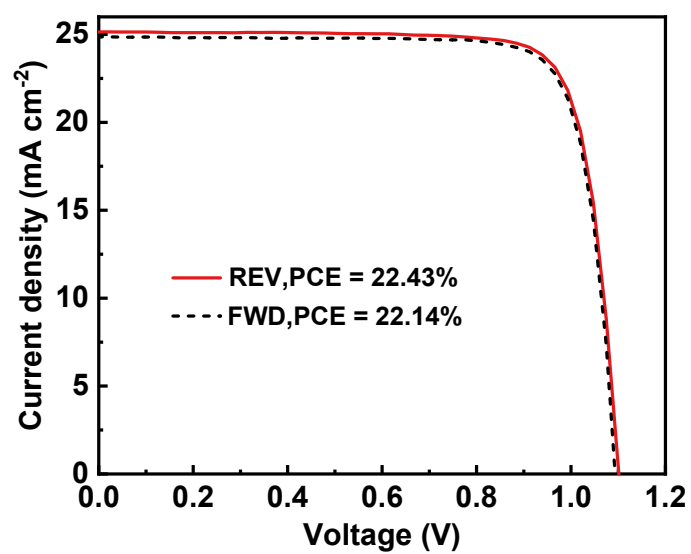

**Figure S2.**  $J$ - $V$  curves of the best flexible unmodified PSCs *via* a forward (FWD) scanning and the reverse (REV) scanning.

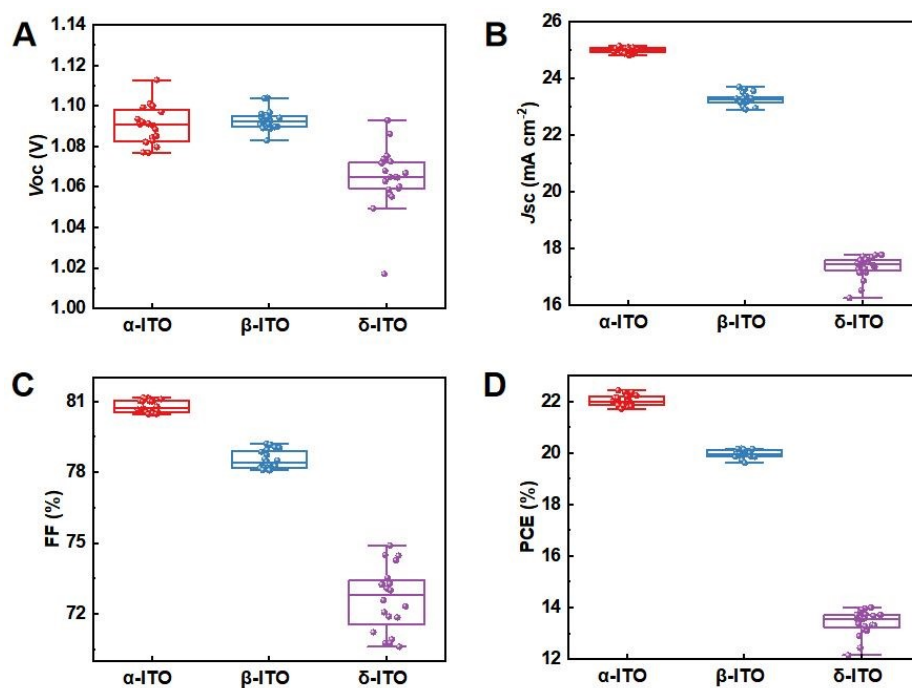

**Figure S3.** Performance distributions of the flexible PSCs with the different ITO-coated plastic substrates. A)  $V_{OC}$ , B)  $J_{SC}$ ; C) FF, and D) PCE.

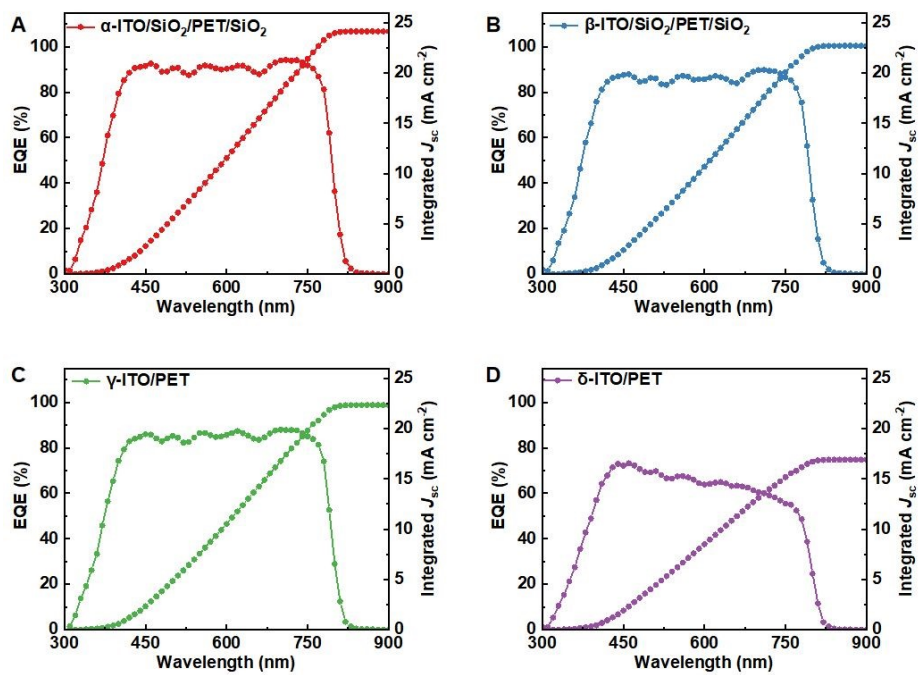

**Figure S4.** EQE spectra of the flexible PSCs with the different ITO-coated plastic substrates.

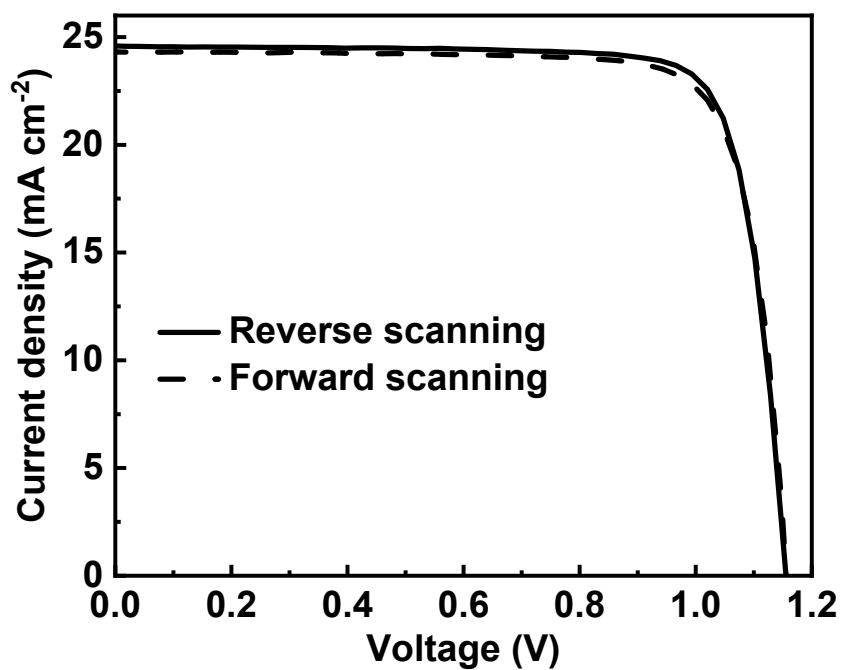

**Figure S5.**  $J$ - $V$  curves of the best flexible GBAC doped PSCs *via* forward scanning and reverse scanning.

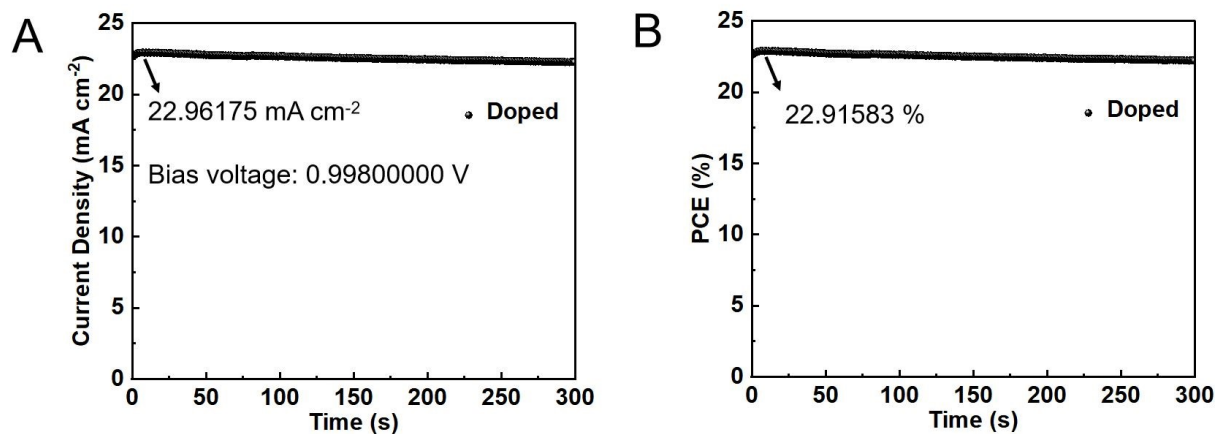

**Figure S6.** Steady-state photocurrent and power output of the GBAc doped flexible PSCs with the  $\alpha$ -ITO/SiO<sub>2</sub>/PET/SiO<sub>2</sub>.

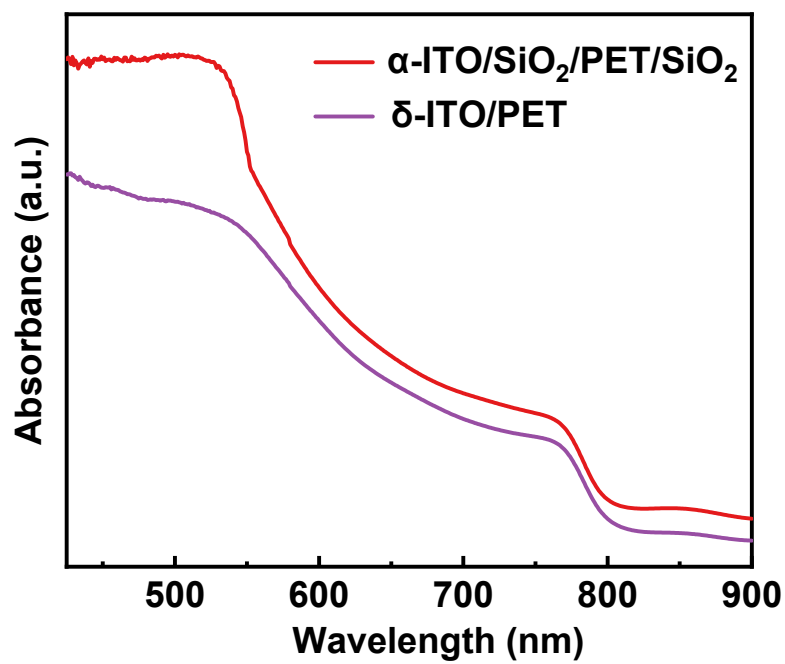

**Figure S7.** The absorption spectra of the  $\alpha$ - and  $\delta$ -ITO based flexible devices without Ag metals.



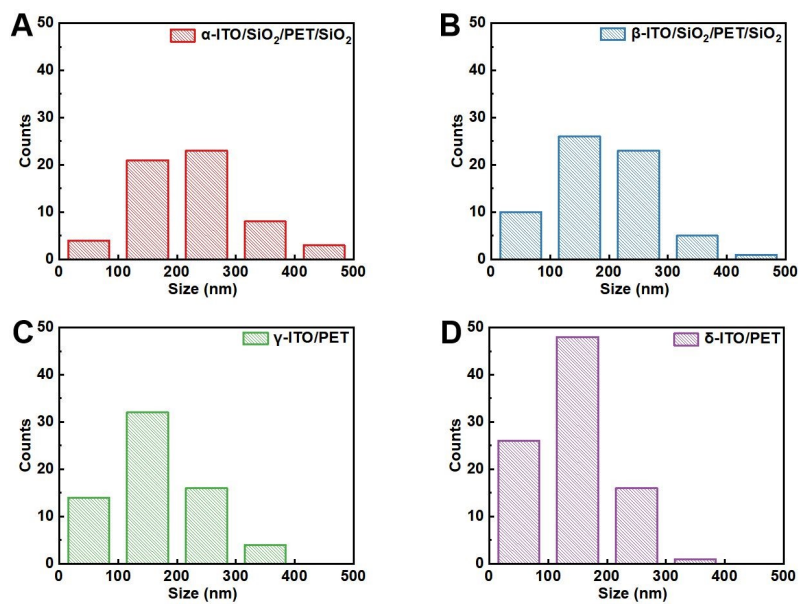

**Figure S8.** The grain size distribution data of the perovskites on the different ITO-coated plastic substrates.

**Table S1.** Comparison of the PCEs of the processing-simple flexible PSCs without surface modifications and dopant incorporation.

| Device Structure                                                                                                                                                          | $V_{OC}$<br>[V] | $J_{SC}$<br>[mA cm <sup>-2</sup> ] | FF<br>[%] | PCE<br>[%]   | Refer.      |
|---------------------------------------------------------------------------------------------------------------------------------------------------------------------------|-----------------|------------------------------------|-----------|--------------|-------------|
| SiO <sub>2</sub> /PET/SiO <sub>2</sub> /ITO/MeO-                                                                                                                          | 1.10            | 25.14                              | 81.16     | <b>22.43</b> | <b>Here</b> |
| 2PACz/Cs <sub>0.05</sub> (FA <sub>0.98</sub> MA <sub>0.02</sub> ) <sub>0.95</sub> Pb(I <sub>0.98</sub> Br <sub>0.02</sub> ) <sub>3</sub> /C <sub>60</sub> /BCP/Ag         | 1.10            | 24.24                              | 79.45     | <b>21.11</b> | 1           |
| PET/ITO/D CPA/Cs <sub>0.05</sub> (FA <sub>0.98</sub> MA <sub>0.02</sub> ) <sub>0.95</sub> Pb(I <sub>0.98</sub> Br <sub>0.02</sub> ) <sub>3</sub> /C <sub>60</sub> /BCP/Ag | 1.10            | 24.95                              | 76.38     | <b>20.96</b> | 2           |
| PET/PEDOT:PSS/PTAA/Cs <sub>0.05</sub> (FA <sub>0.95</sub> MA <sub>0.05</sub> ) <sub>0.95</sub> Pb(I <sub>0.95</sub> Br <sub>0.05</sub> ) <sub>3</sub> /PCBM/BCP/Ag        | 1.12            | 24.90                              | 76.00     | <b>21.13</b> | 3           |
| PEN/ITO/PTAA//FA <sub>y</sub> MA <sub>1-y</sub> PbI <sub>3-x</sub> Cl <sub>x</sub> /C <sub>60</sub> /BCP/Cu                                                               | 1.05            | 21.86                              | 77.42     | <b>17.77</b> | 4           |
| SUPA/PEN/ITO/PTAA/MA <sub>0.6</sub> FA <sub>0.4</sub> PbI <sub>2.9</sub> Br <sub>0.1</sub> /C <sub>60</sub> /BCP/Cu                                                       | 1.07            | 21.92                              | 80.20     | <b>18.84</b> | 5           |
| PEN/ITO/UV-NiO <sub>x</sub> /Cs <sub>0.05</sub> FA <sub>0.85</sub> MA <sub>0.1</sub> PbI <sub>2.91</sub> Br <sub>0.09</sub> /C <sub>60</sub> /BCP/Cu                      | 1.11            | 22.26                              | 79.57     | <b>19.70</b> | 6           |
| PEN/ITO/PTAA/Cs <sub>0.15</sub> FA <sub>0.85</sub> Pb(I <sub>0.95</sub> Br <sub>0.05</sub> ) <sub>3</sub> /PCBM/BCP/Ag                                                    | 1.15            | 22.55                              | 80.50     | <b>20.90</b> | 7           |
| PET/ITO/PTAA/MAPbI <sub>3</sub> /C <sub>60</sub> /BCP/Cu                                                                                                                  | 1.16            | 21.98                              | 79.11     | <b>20.17</b> | 8           |
| PEN/ITO/NiO <sub>x</sub> /Cs <sub>0.1</sub> FA <sub>0.7</sub> MA <sub>0.2</sub> PbI <sub>x</sub> Br <sub>3-x</sub> /PCBM/BCP/Ag                                           | 1.09            | 22.09                              | 79.28     | <b>19.01</b> | 9           |
| PEN/ITO/Cs <sub>0.3</sub> (MA <sub>0.05</sub> FA <sub>0.95</sub> ) <sub>0.97</sub> Pb(I <sub>0.95</sub> Br <sub>0.05</sub> ) <sub>3</sub> /C <sub>60</sub> /BCP/Cu        | 1.07            | 23.22                              | 74.90     | <b>18.59</b> | 10          |
| PET/ITO/PTAA/MAPbI <sub>3</sub> /C <sub>60</sub> /BCP/Ag                                                                                                                  | 1.07            | 22.40                              | 72.00     | <b>17.27</b> | 11          |
| PEN/ITO/PTAA/Cs <sub>0.05</sub> FA <sub>0.7</sub> MA <sub>0.25</sub> Pb(I <sub>0.93</sub> Br <sub>0.07</sub> ) <sub>3</sub> /PCBM/BCP/Ag                                  | 1.04            | 23.89                              | 74.50     | <b>18.51</b> | 12          |
| PEN/ITO/Spiro-TTBb/MAPbI <sub>3</sub> /PCBM/BCP/Ag                                                                                                                        | 1.10            | 21.70                              | 81.19     | <b>19.34</b> | 13          |
| PEN/ITO/NiO <sub>x</sub> /(FA <sub>0.83</sub> MA <sub>0.17</sub> ) <sub>0.95</sub> Cs <sub>0.05</sub> Pb(I <sub>0.9</sub> Br <sub>0.1</sub> ) <sub>3</sub> /PCBM/BCP/Ag   | 1.07            | 21.60                              | 77.80     | <b>18.10</b> | 14          |
| PET/ITO/CuPC/MAPbI <sub>3</sub> /C <sub>60</sub> /BCP/Ag                                                                                                                  | 1.10            | 22.65                              | 75.00     | <b>18.68</b> | 15          |
| PEN/ITO/PEDOT:PSS/PTAA/MAPbI <sub>3</sub> /PCBM/BCP/Ag                                                                                                                    | 1.09            | 21.98                              | 81.00     | <b>19.41</b> | 16          |
| PEN/ITO/NiO <sub>x</sub> :PDA/MAPbI <sub>3</sub> /PCBM/BCP/Ag                                                                                                             | 1.04            | 20.78                              | 77.40     | <b>16.76</b> | 17          |
| PET/ITO/NiO <sub>x</sub> /FA <sub>y</sub> MA <sub>1-y</sub> PbI <sub>3-x</sub> Cl <sub>x</sub> /PCBM/BCP/Ag                                                               | 1.06            | 22.23                              | 73.00     | <b>17.23</b> | 18          |
| PET/PEDOT:PSS(PH1000)/PTAA/MAPbI <sub>3</sub> /C <sub>60</sub> /BCP/Cu/parylene                                                                                           | 0.96            | 22.45                              | 79.00     | <b>17.03</b> | 19          |
| PET/ITO/NiO <sub>x</sub> /Cs <sub>0.1</sub> FA <sub>0.7</sub> MA <sub>0.2</sub> PbI <sub>x</sub> Br <sub>3-x</sub> /PCBM/BCP/Ag                                           | 1.04            | 21.78                              | 78.00     | <b>17.69</b> | 20          |

## References

1. Wu, S., Zhang, J., Qin, M., Li, F., Deng, X., Lu, X., Li, W., Alex, K.Y. (2023). Manipulating Crystallographic Orientation via Cross-Linkable Ligand for Efficient and Stable Perovskite Solar Cells. *Small* 19, 2207189.
2. Gao, D., Li, B., Li, Z., Wu, X., Zhang, S., Zhao, D., Jiang, X., Zhang, C., Wang, Y., Li, Z., Li, N., Xiao, S., Wallace C.H., et al. (2022). Highly Efficient Flexible Perovskite Solar Cells

through Pentylammonium Acetate Modification with Certified Efficiency of 23.35%. *Adv. Mater.* *35*, 2206387.

3. Cheng, H., Liu, C., Zhuang, J., Cao, J., Wang, T., Wong, W., Yan, F. (2022). KBF<sub>4</sub> Additive for Alleviating Microstrain, Improving Crystallinity, and Passivating Defects in Inverted Perovskite Solar Cells. *Adv. Funct. Mater.* *32*, 2204880.

4. Ge, C., Liu, X., Yang, Z., Li, H., Niu, W., Liu, X., Xong, Q. (2021). Thermal Dynamic Self-Healing Supramolecular Dopant Towards Efficient and Stable Flexible Perovskite Solar Cells. *Angew. Chem. Int. Ed.* *61*, e202116602.

5. Choi, J.S., Jang, Y.W., Kim, W., Choi, M., Kang, S.M. (2022). Optically and Mechanically Engineered Anti-Reflective Film for Highly Efficient Rigid and Flexible Perovskite Solar Cells. *Adv. Energy Mater.* *12*, 2201520.

6. Lian, Q., Wang, P., Wang, G., Zhang, X., Huang, Y., Li, D., Mi, G., Shi, R., Amini, A., Zhang, L., Cheng, C. (2022). Doping Free and Amorphous NiO<sub>x</sub> Film via UV Irradiation for Efficient Inverted Perovskite Solar Cells. *Adv. Sci.* *9*, 2201543.

7. Liu, S., Guan, X., Xiao, W., Chen, R., Zhou, J., Ren, F., Wang, J., Chen, W., Li, S., Qiu, L., Zhao, Y., Liu, Z., Chen, W. (2022). Effective Passivation with Size-Matched Alkyldiammonium Iodide for High-Performance Inverted Perovskite Solar Cells. *Adv. Funct.* *32*, 2205009.

8. Kang, Y., Li, R., Wang, A., Kang, J.J., Wang, Z., Bi, W., Yang, Y., Song, Y., Dong, Q. (2022). Ionogel-perovskite matrix enabling highly efficient and stable flexible solar cells towards fully-R2R fabrication. *Energy Environ. Sci.* *15*, 3439-3448.

9. Fan, B., Xiong, J., Zhang, Y., Gong, C., Li, F., Meng, X., Hu, X., Yuan, Z., Wang, F., Chen, Y. (2022). A Bionic Interface to Suppress the Coffee-Ring Effect for Reliable and Flexible Perovskite Modules with a Near-90% Yield Rate. *Adv. Mater.* *34*, 2201840.

10. Dou, J., Song, Q., Ma, Y., Wang, H., Yuan, G., Wei, X., Niu, X., Ma, S., Yang, X., Dou, J., Liu, S., Zhou, H., et al. (2023). Improved interfacial adhesion for stable flexible inverted perovskite solar cells. *J. Energy Chem.* *76*, 288-294.

11. Tabakoli, M.M., Tavakoli, R. (2020). All-Vacuum-Processing for Fabrication of Efficient, Large-Scale, and Flexible Inverted Perovskite Solar Cells. *Phys Status Solidi Rapid Res Lett.* *15*, 200049.

12. Wang, Z., Lu, Y., Xu, Z., Hu, J., Chen, Y., Zhang, C., Wang, Y., Guo, F., Mai, Y. (2021). An Embedding 2D/3D Heterostructure Enables High-Performance FA-Alloyed Flexible Perovskite Solar Cells with Efficiency over 20%. *Adv. Sci.* *8*, 2101856.

13. Li, J., Dewi, H.J., Wang, H., Zhao, J., Tiwari, N., Yantara, N., Malinauskas, T., Getautis, V., Savenije, T., Mathews, N., et al. (2021). Co-Evaporated MAPbI<sub>3</sub> with Graded Fermi Levels Enables Highly Performing, Scalable, and Flexible p-i-n Perovskite Solar Cells. *Adv. Funct.* *31*, 2103252.
14. Wang, Z., Rong, X., Wang, L., Wang, W., Lin, H., Lin, X. (2020). Dual Role of Amino-Functionalized Graphene Quantum Dots in NiO<sub>x</sub> Films for Efficient Inverted Flexible Perovskite Solar Cells. *ACS Appl. Mater. Interfaces.* *12*, 8342-8350.
